# Supplementary material for: Magnetism and Electronic State of Iron Ions on the Surface and in the Core of TiO2 Nanoparticles
Source: MDPI journal article supplement (doi:10.3390/magnetochemistry9080198), 2023-08-03
Supplement: s1 [file s1]

Archive with 1 entries (1 files):
- magnetochemistry-2488638-supplementary.pdf
